# Supplementary material for: ApCPEB4, a non-prion domain containing homolog of ApCPEB, is involved in the initiation of long-term facilitation
Source: PubMed Central journal article supplement (PMC5075418; doi:10.1186/s13041-016-0271-x), 2016-10-22
Supplement: 13041_2016_271_MOESM1_ESM.pdf [file 13041_2016_271_MOESM1_ESM.pdf]

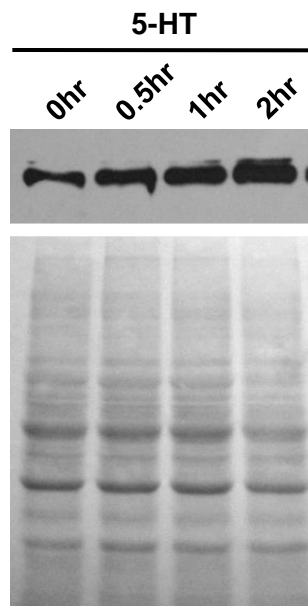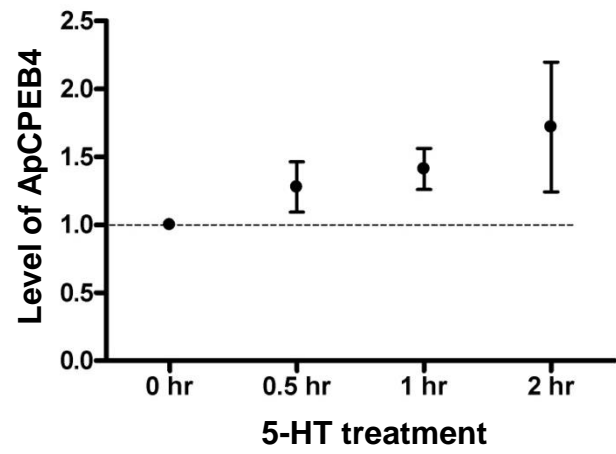

Supplementary Fig. 1
